# Supplementary material for: Development and Evaluation of a Physiologically Based Pharmacokinetic Model of Labetalol in Healthy and Diseased Populations
Source: MDPI journal article supplement (doi:10.3390/pharmaceutics14112362), 2022-11-02
Supplement: s1 [file s1]

## Development and Evaluation of a Physiologically Based Pharmacokinetic Model of labetalol in healthy and diseased populations

Hafsa Hafsa <sup>1</sup>, Ammara Zamir <sup>1</sup>, Muhammad Fawad Rasool <sup>1,\*</sup>, Imran Imran <sup>2</sup>, Hamid Saeed <sup>3</sup>, Tanveer Ahmad <sup>4</sup>, Sary Alsanea <sup>5</sup>, Ali A. Alshamrani <sup>5</sup>, Abdullah H. Alruwaili <sup>5</sup> and Faleh Alqahtani <sup>5,\*</sup>

<sup>1</sup> Department of Pharmacy Practice, Faculty of Pharmacy, Bahauddin Zakariya University, Multan 60800, Pakistan

<sup>2</sup> Department of Pharmacology, Faculty of Pharmacy, Bahauddin Zakariya University, Multan 60800, Pakistan

<sup>3</sup> Section of Pharmaceutics, University College of Pharmacy, Allama Iqbal Campus, University of the Punjab, Lahore 54000, Pakistan

<sup>4</sup> Institute for Advanced Biosciences (IAB), CNRS UMR5309, INSERM U1209, Grenoble Alpes University, 38700 La Tronche, France

<sup>5</sup> Department of Pharmacology and Toxicology, College of Pharmacy, King Saud University, Riyadh 11451, Saudi Arabia

\* Correspondence: fawadrasool@bzu.edu.pk (M.F.R.); afaleh@ksu.edu.sa (F.A.)

**Supplementary Table S1. Screening of articles based on title, abstract, involvement of animals, and accessibility**

| Sr. | Title of article                                                                                                                                                                                                                                                                                                     | Exclusion bases |
|-----|----------------------------------------------------------------------------------------------------------------------------------------------------------------------------------------------------------------------------------------------------------------------------------------------------------------------|-----------------|
| 1   | Donnelly, R. and G. J. Macphee (1991). "Clinical pharmacokinetics and kinetic-dynamic relationships of dilevalol and labetalol." <i>Clinical pharmacokinetics</i> 21(2): 95-109.                                                                                                                                     | Abstract        |
| 2   | Ågesen, F. N., et al. (2019). "Pharmacokinetic variability of beta-adrenergic blocking agents used in cardiology." <i>Pharmacol Res Perspect</i> 7(4): e00496.                                                                                                                                                       | Title           |
| 3   | Fongemie, J. and E. Felix-Getzik (2015). "A Review of Nebivolol Pharmacology and Clinical Evidence." <i>Drugs</i> 75(12): 1349-1371.                                                                                                                                                                                 | Title           |
| 4   | Kaye, A. B., et al. (2019). "Review of Cardiovascular Drugs in Pregnancy." <i>J Womens Health (Larchmt)</i> 28(5): 686-697.                                                                                                                                                                                          | Title           |
| 5   | Yeleswaram, K., et al. (1992). "Pharmacokinetics and pharmacodynamics of labetalol in the pregnant sheep." <i>J Pharmacol Exp Ther</i> 262(2): 683-691.                                                                                                                                                              | Animal          |
| 6   | Fischer, J. H., et al. (2014). "Influence of gestational age and body weight on the pharmacokinetics of labetalol in pregnancy." <i>Clin Pharmacokinet</i> 53(4): 373-383.                                                                                                                                           | Abstract        |
| 7   | Mulrenin, I. R., et al. (2021). "The Impact of Pregnancy on Antihypertensive Drug Metabolism and Pharmacokinetics: Current Status and Future Directions." <i>Expert Opin Drug Metab Toxicol</i> 17(11): 1261-1279.                                                                                                   | Title           |
| 8   | Clark, S. M., et al. (2015). "A review of oral labetalol and nifedipine in mild to moderate hypertension in pregnancy." <i>Semin Perinatol</i> 39(7): 548-555.                                                                                                                                                       | Abstract        |
| 9   | Rawat, P. S., et al. (2020). "Development and validation of a bio-analytical method for simultaneous quantification of nebivolol and labetalol in aqueous humor and plasma using LC-MS/MS and its application to ocular pharmacokinetic studies." <i>J Chromatogr B Analyt Technol Biomed Life Sci</i> 1136: 121908. | Title           |
| 10  | McNeil, J. J. and W. J. Louis (1984). "Clinical pharmacokinetics of labetalol." <i>Clin Pharmacokinet</i> 9(2): 157-167.                                                                                                                                                                                             | Abstract        |
| 11  | Sanders, G. L., et al. (1980). "Pharmacokinetics, beta-adrenoceptor blockade and anti-hypertensive action of labetalol during chronic oral treatment." <i>Br J Clin Pharmacol</i> 10(2): 121-126.                                                                                                                    | Abstract        |

| Sr. | Title of article                                                                                                                                                                                                                      | Exclusion bases |
|-----|---------------------------------------------------------------------------------------------------------------------------------------------------------------------------------------------------------------------------------------|-----------------|
| 12  | Rocci, M. L., Jr., et al. (1990). "Pharmacokinetics and pharmacodynamics of labetalol in elderly and young hypertensive patients following single and multiple doses." <i>Pharmacotherapy</i> 10(2): 92-99.                           | Abstract        |
| 13  | Chera-Aree, P., et al. (2020). "Clinical Experiences of Intravenous Hydralazine and Labetalol for Acute Treatment of Severe Hypertension in Pregnant Thai Women." <i>J Clin Pharmacol</i> 60(12): 1662-1670.                          | Title           |
| 14  | Awni, W. M., et al. (1988). "Interindividual and intraindividual variability in labetalol pharmacokinetics." <i>J Clin Pharmacol</i> 28(4): 344-349.                                                                                  | Abstract        |
| 15  | Sonne, J., et al. (1990). "Single dose pharmacokinetics and pharmacodynamics of oral oxazepam during concomitant administration of propranolol and labetalol." <i>Br J Clin Pharmacol</i> 29(1): 33-37.                               | No access       |
| 16  | Alshami, A., et al. (2018). "Management of hypertensive crises in the elderly." <i>J Geriatr Cardiol</i> 15(7): 504-512.                                                                                                              | Abstract        |
| 17  | McNeil, J. J., et al. (1979). "Pharmacokinetics and pharmacodynamic studies of labetalol in hypertensive subjects." <i>Br J Clin Pharmacol</i> 8(Suppl 2): 157s-161s.                                                                 | Abstract        |
| 18  | Incecayir, T., et al. (2013). "Comparison of the permeability of metoprolol and labetalol in rat, mouse, and Caco-2 cells: use as a reference standard for BCS classification." <i>Mol Pharm</i> 10(3): 958-966.                      | Animal          |
| 19  | Nylund, L., et al. (1984). "Labetalol for the treatment of hypertension in pregnancy. Pharmacokinetics and effects on the uteroplacental blood flow." <i>Acta Obstet Gynecol Scand Suppl</i> 118: 71-73.                              | Title           |
| 20  | Hermann, D. J., et al. (1992). "Comparison of verapamil, diltiazem, and labetalol on the bioavailability and metabolism of imipramine." <i>J Clin Pharmacol</i> 32(2): 176-183.                                                       | Abstract        |
| 21  | Riva, E., et al. (1991). "The alpha- and beta-adrenoceptor blocking activities of labetalol and its RR-SR (50:50) stereoisomers." <i>Br J Pharmacol</i> 104(4): 823-828.                                                              | Abstract        |
| 22  | Carvalho, T. M., et al. (2009). "Stereoselective analysis of labetalol in human plasma by LC-MS/MS: application to pharmacokinetics." <i>Chirality</i> 21(8): 738-744.                                                                | Title           |
| 23  | Kanto, J., et al. (1981). "Pharmacokinetics of labetalol in healthy volunteers." <i>Int J Clin Pharmacol Ther Toxicol</i> 19(1): 41-44.                                                                                               | No access       |
| 24  | Dong, S., et al. (2016). "Graphene Facilitated Removal of Labetalol in Laccase-ABTS System: Reaction Efficiency, Pathways and Mechanism." <i>Sci Rep</i> 6: 21396.                                                                    | Title           |
| 25  | Abernethy, D. R., et al. (1987). "Comparison in young and elderly patients of pharmacodynamics and disposition of labetalol in systemic hypertension." <i>Am J Cardiol</i> 60(8): 697-702.                                            | Title           |
| 26  | Yeleswaram, K., et al. (1993). "Transplacental and nonplacental clearances, metabolism and pharmacodynamics of labetalol in the fetal lamb after direct intravenous administration." <i>J Pharmacol Exp Ther</i> 267(1): 425-431.     | Animal          |
| 27  | Yeleswaram, K., et al. (1993). "Disposition, metabolism, and pharmacodynamics of labetalol in adult sheep." <i>Drug Metab Dispos</i> 21(2): 284-292.                                                                                  | Animal          |
| 28  | Kanto, J. H. (1985). "Current status of labetalol, the first alpha- and beta-blocking agent." <i>Int J Clin Pharmacol Ther Toxicol</i> 23(11): 617-628.                                                                               | Abstract        |
| 29  | Bates, J., et al. (1987). "Combined use of an automated sample processor and a polymer-based high-performance liquid chromatographic column to determine the pharmacokinetics of labetalol in man." <i>J Chromatogr</i> 395: 455-461. | Title           |
| 30  | Abushammala, I., et al. (2006). "Labetalol absorption kinetics: rat small intestine and colon studies." <i>J Pharm Sci</i> 95(8): 1733-1741.                                                                                          | Animal          |
| 31  | Daneshmend, T. K. and C. J. Roberts (1981). "Cimetidine and bioavailability of labetalol." <i>Lancet</i> 1(8219): 565.                                                                                                                | Title           |
| 32  | Chauvin, M., et al. (1987). "Continuous i.v. infusion of labetalol for postoperative hypertension. Haemodynamic effects and plasma kinetics." <i>Br J Anaesth</i> 59(10): 1250-1256.                                                  | Title           |

| Sr. | Title of article                                                                                                                                                                                                         | Exclusion bases |
|-----|--------------------------------------------------------------------------------------------------------------------------------------------------------------------------------------------------------------------------|-----------------|
| 33  | Li, P., et al. (2012). "Hepatocellular necrosis, fibrosis and microsomal activity determine the hepatic pharmacokinetics of basic drugs in right-heart-failure-induced liver damage." <i>Pharm Res</i> 29(6): 1658-1669. | Title           |
| 34  | Louis, W. J., et al. (1984). "Pharmacology of combined alpha-beta-blockade. I." <i>Drugs</i> 28 Suppl 2: 16-34.                                                                                                          | Title           |
| 35  | Khafagi, F. A., et al. (1989). "Labetalol reduces iodine-131 MIBG uptake by pheochromocytoma and normal tissues." <i>J Nucl Med</i> 30(4): 481-489.                                                                      | Title           |
| 36  | Kouoh, F., et al. (2004). "In vitro and ex vivo antioxidant activities of labetalol on rabbit neutrophil respiratory burst." <i>Adv Ther</i> 21(3): 178-185.                                                             | Animal          |
| 37  | Chrisp, P. and K. L. Goa (1990). "Dilevalol. A review of its pharmacodynamic and pharmacokinetic properties, and therapeutic potential in hypertension." <i>Drugs</i> 39(2): 234-263.                                    | Title           |
| 38  | Scalzo, F. M., et al. (1993). "Effects of labetalol on cocaine pharmacokinetics in neonatal piglets." <i>Dev Pharmacol Ther</i> 20(1-2): 54-63.                                                                          | Animal          |
| 39  | McTavish, D., et al. (1993). "Carvedilol. A review of its pharmacodynamic and pharmacokinetic properties, and therapeutic efficacy." <i>Drugs</i> 45(2): 232-258.                                                        | Title           |
| 40  | Johnson, J. A., et al. (2000). "Gender differences in labetalol kinetics: importance of determining stereoisomer kinetics for racemic drugs." <i>Pharmacotherapy</i> 20(6): 622-628.                                     | Abstract        |
| 41  | Singh, B. N., et al. (1985). "Acebutolol. A review of its pharmacological properties and therapeutic efficacy in hypertension, angina pectoris and arrhythmia." <i>Drugs</i> 29(6): 531-569.                             | Title           |
| 42  | Drop, L., et al. (1998). "Comparative doses and cost: esmolol versus labetalol during electroconvulsive therapy." <i>Anesth Analg</i> 86(4): 916-917.                                                                    | Title           |
| 43  | Alton, K. B., et al. (1994). "Urinary metabolites of (R),(R)-labetalol." <i>Drug Metab Dispos</i> 22(6): 866-872.                                                                                                        | Abstract        |
| 44  | Hosey, C. M. and L. Z. Benet (2015). "Predicting the extent of metabolism using in vitro permeability rate measurements and in silico permeability rate predictions." <i>Mol Pharm</i> 12(5): 1456-1466.                 | Title           |
| 45  | Radwanski, E., et al. (1988). "Secretion of dilevalol in breast milk." <i>J Clin Pharmacol</i> 28(5): 448-453.                                                                                                           | Title           |
| 46  | Klotz, U. and I. Reimann (1983). "[Effect of histamine H2-receptor antagonists on the hepatic elimination of drugs]." <i>Klin Wochenschr</i> 61(13): 625-632.                                                            | Title           |
| 47  | Shen, J. J., et al. (1991). "Response to beta-blockers in maternal and fetal rat hearts in vitro." <i>Life Sci</i> 48(18): 1737-1743.                                                                                    | Animal          |
| 48  | Schneider, H. and M. Proegler (1988). "Placental transfer of beta-adrenergic antagonists studied in an in vitro perfusion system of human placental tissue." <i>Am J Obstet Gynecol</i> 159(1): 42-47.                   | Title           |
| 49  | Haraldsson, A. and W. Geven (1989). "Half-life of maternal labetalol in a premature infant." <i>Pharm Weekbl Sci</i> 11(6): 229-231.                                                                                     | No access       |
| 50  | Baba, T., et al. (1988). "Effects of dilevalol, an R, R-isomer of labetalol, on blood pressure and renal function in patients with mild-to-moderate essential hypertension." <i>Eur J Clin Pharmacol</i> 35(1): 9-15.    | Title           |
| 51  | Keski-Rahkonen, P., et al. (2007). "Determination of tamsulosin in human aqueous humor and serum by liquid chromatography-electrospray ionization tandem mass spectrometry." <i>J Pharm Biomed Anal</i> 43(2): 606-612.  | Title           |
| 52  | Gasparović, V., et al. (1988). "[Pharmacokinetics of labetalol in patients on hemodialysis]." <i>Acta Med Jugosl</i> 42(2): 141-145.                                                                                     | Abstract        |
| 53  | Wang, W., et al. (1991). "Lipophilicity influence on conjunctival drug penetration in the pigmented rabbit: a comparison with corneal penetration." <i>Curr Eye Res</i> 10(6): 571-579.                                  | Animal          |
| 54  | Thorsteinsson, A., et al. (2008). "Severe labetalol overdose in an 8-month-old infant." <i>Paediatr Anaesth</i> 18(5): 435-438.                                                                                          | Title           |
| 55  | Adamska-Dyniewska, H., et al. (1986). "The effect of six beta-adrenolytics and labetalol on hepatic biotransformation studied by antipyrine test, in man." <i>Int J Clin Pharmacol Ther Toxicol</i> 24(6): 303-307.      | Title           |

| Sr. | Title of article                                                                                                                                                                                                                                                                               | Exclusion bases |
|-----|------------------------------------------------------------------------------------------------------------------------------------------------------------------------------------------------------------------------------------------------------------------------------------------------|-----------------|
| 56  | Kandasamy, K., et al. (2011). "Bioanalytical method development, validation and quantification of flupirtine maleate in rat plasma by liquid chromatography-tandem mass spectrometry." <i>Arzneimittelforschung</i> 61(12): 693-699.                                                           | Animal          |
| 57  | Nielsen, H. M. and M. R. Rassing (2000). "TR146 cells grown on filters as a model of human buccal epithelium: IV. Permeability of water, mannitol, testosterone and beta-adrenoceptor antagonists. Comparison to human, monkey and porcine buccal mucosa." <i>Int J Pharm</i> 194(2): 155-167. | Title           |
| 58  | Partridge, B. L., et al. (1988). "Life-threatening effects of intravascular absorption of PGF2 alpha during therapeutic termination of pregnancy." <i>Anesth Analg</i> 67(11): 1111-1113.                                                                                                      | Title           |
| 59  | Grellet, J., et al. (1994). "Sensitive high-performance liquid chromatographic method for the determination of labetalol diastereoisomers in plasma samples without derivatization." <i>J Chromatogr</i> 652(1): 59-66.                                                                        | Title           |
| 60  | Cubeddu, L. X., et al. (1987). "Mechanism of the vasodilatory effect of carvedilol in normal volunteers: a comparison with labetalol." <i>J Cardiovasc Pharmacol</i> 10 Suppl 11: S81-84.                                                                                                      | No access       |
| 61  | Villarroya, M., et al. (1997). "Distinct effects of omega-toxins and various groups of Ca(2+)-entry inhibitors on nicotinic acetylcholine receptor and Ca2+ channels of chromaffin cells." <i>Eur J Pharmacol</i> 320(2-3): 249-257.                                                           | Title           |
| 62  | Aqil, M., et al. (2005). "Transdermal drug delivery of labetalol hydrochloride: system development, in vitro; ex vivo and in vivo characterization." <i>Curr Drug Deliv</i> 2(2): 125-131.                                                                                                     | Title           |
| 63  | Meredith, P. A., et al. (1981). "The determination of labetalol in plasma by high-performance liquid chromatography using fluorescence detection." <i>J Pharmacol Methods</i> 6(4): 309-314.                                                                                                   | Title           |
| 64  | Stupack, D. G., et al. (1999). "Heterogeneity among beta-adrenoreceptor blockers in the modulation of energy-dependent uptake of the organic cation amantadine by rat renal tubules." <i>Can J Physiol Pharmacol</i> 77(6): 407-413.                                                           | Title           |
| 65  | Kusala, S., et al. (1987). "[Relative biological availability of labetalol after the administration of the Trandate (Allen & Hanburys) and Coreton (VULM) preparations]." <i>Cesk Fysiol</i> 36(1): 78-85.                                                                                     | Title           |
| 66  | Catapano, M. S. and J. A. Marx (1986). "Management of urgent hypertension: a comparison of oral treatment regimens in the emergency department." <i>J Emerg Med</i> 4(5): 361-368.                                                                                                             | Title           |
| 67  | Doroudian, A., et al. (1993). "Sensitive high-performance liquid chromatographic method for direct separation of labetalol stereoisomers in biological fluids using an alpha 1-acid glycoprotein stationary phase." <i>J Chromatogr</i> 619(1): 79-86.                                         | Title           |
| 68  | Mayer, S., et al. (2000). "Influence of drugs on myocardial iodine-123 metaiodobenzylguanidine uptake in rabbit myocardium." <i>Eur J Nucl Med</i> 27(3): 340-345.                                                                                                                             | Animal          |
| 69  | Weissman, C., et al. (1995). "Do synthetic adrenergic agents interfere with the measurement of endogenous plasma catecholamine concentrations?" <i>J Crit Care</i> 10(2): 72-77.                                                                                                               | Title           |
| 70  | Hu, O. Y., et al. (1991). "Determination of vecuronium in blood by HPLC with UV and electrochemical detection: a pilot study in man." <i>Proc Natl Sci Counc Repub China B</i> 15(3): 186-190.                                                                                                 | Title           |
| 71  | Kinami, J., et al. (1993). "Nipradilol displays a unique pharmacological profile of affinities for the different alpha 1-adrenoceptor subtypes." <i>Jpn J Pharmacol</i> 61(2): 81-86.                                                                                                          | Title           |
| 72  | Huguet, F., et al. (1996). "Interaction of metaiodobenzylguanidine with cardioactive drugs: an in vitro study." <i>Eur J Nucl Med</i> 23(5): 546-549.                                                                                                                                          | Title           |
| 73  | Donaghy, S. (2005). "Choice of antihypertensives after acute ischemic stroke." <i>Cmaj</i> 173(4): 340; author reply 340.                                                                                                                                                                      | Title           |
| 74  | Sala, X., et al. (1993). "[Cardiac arrest in newborn of mother treated with labetalol]." <i>Rev Esp Anesthesiol Reanim</i> 40(3): 146-147.                                                                                                                                                     | Title           |
| 75  | Fujimura, A., et al. (1989). "Clinical pharmacology of dilevalol (III). A pharmacokinetic study of dilevalol in elderly subjects with essential hypertension." <i>J Clin Pharmacol</i> 29(11): 1008-1012.                                                                                      | Title           |

| Sr. | Title of article                                                                                                                                                                                                                                | Exclusion bases |
|-----|-------------------------------------------------------------------------------------------------------------------------------------------------------------------------------------------------------------------------------------------------|-----------------|
| 76  | Kelly, J. G., et al. (1990). "The pharmacokinetics of dilevalol in renal impairment." <i>J Hum Hypertens</i> 4 Suppl 2: 59-62.                                                                                                                  | Title           |
| 77  | Oosterhuis, B., et al. (1981). "HPLC-analysis and preliminary pharmacokinetic parameter estimations of chloroquine." <i>Pharm Weekbl Sci</i> 3(6): 263-267.                                                                                     | Title           |
| 78  | Mann, H. J. and R. J. Klecker (1986). "Cost analysis of substituting labetalol for nitroprusside." <i>Am J Hosp Pharm</i> 43(6): 1501-1502.                                                                                                     | Title           |
| 79  | Adamska-Dyniewska, H. and S. Dziekański (1984). "[Effect of labetalol on antipyrine metabolism in the liver]." <i>Pol Arch Med Wewn</i> 71(3): 149-155.                                                                                         | Title           |
| 80  | Sun, C.-J., et al. (2018). "Associations of polymorphisms of CYP2D6 and CYP2C9 with early onset severe pre-eclampsia and response to labetalol therapy." <i>Archives of Gynecology and Obstetrics</i> 298(1): 125-132.                          | Title           |
| 81  | Jeong, H., et al. (2008). "Regulation of UDP-glucuronosyltransferase (UGT) 1A1 by progesterone and its impact on labetalol elimination." <i>Xenobiotica</i> 38(1): 62-75.                                                                       | Abstract        |
| 82  | Olsen, K., et al. (1995). "Effect of labetalol on cerebral blood flow, oxygen metabolism and autoregulation in healthy humans." <i>British Journal of Anaesthesia</i> 75(1): 51-54.                                                             | Abstract        |
| 83  | Saotome, T., et al. (1993). "Labetalol in Hypertension During the Third Trimester of Pregnancy: Its Antihypertensive Effect and Pharmacokinetic-Dynamic Analysis." <i>The Journal of Clinical Pharmacology</i> 33(10): 979-988.                 | Title           |
| 84  | Alton, K., et al. (1984). "High-performance liquid chromatographic assay for labetalol in human plasma using a PRP-1 column and fluorometric detection." <i>Journal of Chromatography B: Biomedical Sciences and Applications</i> 311: 319-328. | Title           |
| 85  | Doroudian, A. (2000). Pharmacokinetics and conjugative metabolism of labetalol stereoisomers in pregnant sheep: A chiral drug case study in pregnancy, National Library of Canada= Bibliothèque nationale du Canada, Ottawa.                    | Animal          |
| 86  | Wallin, J. D. and W. M. O'Neill (1983). "Labetalol: Current research and therapeutic status." <i>Archives of internal medicine</i> 143(3): 485-490.                                                                                             | Abstract        |
| 87  | Scott, A. K. (1993). "Stereoisomers and drug toxicity." <i>Drug safety</i> 8(2): 149-159.                                                                                                                                                       | Title           |
| 88  | van Zwieten, P. A. (1993). "An overview of the pharmacodynamic properties and therapeutic potential of combined $\alpha$ - and $\beta$ -adrenoceptor antagonists." <i>Drugs</i> 45(4): 509-517.                                                 | Abstract        |
| 89  | Pagliara, A., et al. (1998). "Molecular properties and pharmacokinetic behavior of cetirizine, a zwitterionic H1-receptor antagonist." <i>Journal of medicinal chemistry</i> 41(6): 853-863.                                                    | Title           |
| 90  | Wang, Y. H., et al. (2012). "UGT2B17 genetic polymorphisms dramatically affect the pharmacokinetics of MK-7246 in healthy subjects in a first-in-human study." <i>Clinical Pharmacology &amp; Therapeutics</i> 92(1): 96-102.                   | Title           |
| 91  | Wood, A. J. and H. H. Zhou (1991). "Ethnic differences in drug disposition and responsiveness." <i>Clinical pharmacokinetics</i> 20(5): 350-373.                                                                                                | Title           |
| 92  | van der Galiën, R., et al. (2019). "Pharmacokinetics of HIV-integrase inhibitors during pregnancy: mechanisms, clinical implications and knowledge gaps." <i>Clinical pharmacokinetics</i> 58(3): 309-323.                                      | Title           |
| 93  | Marasanapalle, V. P., et al. (2011). "Correlation between the systemic clearance of drugs and their food effects in humans." <i>Drug Development and Industrial Pharmacy</i> 37(11): 1311-1317.                                                 | Title           |
| 94  | Fokina, V. M., et al. (2016). "Pharmacokinetics of bupropion and its pharmacologically active metabolites in pregnancy." <i>Drug Metabolism and Disposition</i> 44(11): 1832-1838.                                                              | Title           |
| 95  | Yang, L., et al. (2021). "Metabolic Activation and Cytotoxicity of Labetalol Hydrochloride Mediated by Sulfotransferases." <i>Chemical Research in Toxicology</i> 34(6): 1612-1618.                                                             | Title           |

**Supplementary Table S2. Quality assessment of included articles using Jadad scoring**

| <b>Sr</b> | <b>Title of Article</b>                                                                                                                                                                    | <b>Jadad Scoring</b> |
|-----------|--------------------------------------------------------------------------------------------------------------------------------------------------------------------------------------------|----------------------|
| 1         | Single-dose pharmacokinetics of labetalol in healthy young men                                                                                                                             | 2+0+0=2              |
| 2         | Clinical pharmacology of dilevalol (I). Comparison of the pharmacokinetic and pharmacodynamic properties of dilevalol and labetalol after a single oral administration in healthy subjects | 2+2+0=4              |
| 3         | Comparison of the clinical pharmacokinetics and concentration-effect relationships for medroxalol and labetalol.                                                                           | 2+2+0=4              |
| 4         | Labetalol pharmacokinetics and pharmacodynamics: evidence of stereoselective disposition.                                                                                                  | 2+2+0=4              |
| 5         | Pharmacokinetic interaction studies of atosiban with labetalol or betamethasone in healthy female volunteers                                                                               | 2+0+0=2              |
| 6         | The influence of food on the oral and intravenous pharmacokinetics of a high clearance drug: a study with labetalol                                                                        | 2+2+1=5              |
| 7         | Decreased first-pass metabolism of labetalol in chronic liver disease.                                                                                                                     | 2+2+0=4              |
| 8         | Elimination kinetics of labetalol in severe renal failure                                                                                                                                  | 2+0+0=2              |
| 9         | The effects of enzyme induction and enzyme inhibition on labetalol pharmacokinetics                                                                                                        | 2+2+0=4              |
| 10        | Rising multiple-dose pharmacokinetics of labetalol in hypertensive patients.                                                                                                               | 2+2+1=5              |

**Supplementary Table S3. Quality assessment of included articles using CASP scoring**

| Questions               | Did the study address a clearly issue? | Did the authors use an appropriate method to answer their questions? | Was the data collected from a clear and suitable source? | Were the controls selected in an acceptable way? | Did the authors dedicate a means to avoid bias? | Have the authors taken account of the potential confounding factors in the design and/or their analysis? | Are the results clear to the reader? | Are the results precise? | Is the model validated? | Is the model applicable to the general population? | Did the results fit with other available evidence? | Score out of 11 |
|-------------------------|----------------------------------------|----------------------------------------------------------------------|----------------------------------------------------------|--------------------------------------------------|-------------------------------------------------|----------------------------------------------------------------------------------------------------------|--------------------------------------|--------------------------|-------------------------|----------------------------------------------------|----------------------------------------------------|-----------------|
| Nyberg et al 1982       | Y                                      | Y                                                                    | Y                                                        | Y                                                | Y                                               | CT                                                                                                       | Y                                    | N                        | N                       | N                                                  | CT                                                 | 6               |
| Fujimura et al (1989)   | Y                                      | Y                                                                    | Y                                                        | Y                                                | N                                               | CT                                                                                                       | Y                                    | N                        | N                       | N                                                  | N                                                  | 5               |
| Elliott et al (1984)    | Y                                      | Y                                                                    | CT                                                       | CT                                               | N                                               | CT                                                                                                       | Y                                    | N                        | N                       | N                                                  | CT                                                 | 3               |
| Lalonde et al (1990)    | Y                                      | Y                                                                    | Y                                                        | N                                                | N                                               | CT                                                                                                       | N                                    | CT                       | CT                      | N                                                  | N                                                  | 3               |
| Rasmussen et al (2005)  | Y                                      | Y                                                                    | Y                                                        | Y                                                | N                                               | CT                                                                                                       | Y                                    | Y                        | N                       | Y                                                  | N                                                  | 7               |
| Daneshmend et al (1982) | Y                                      | Y                                                                    | Y                                                        | N                                                | N                                               | CT                                                                                                       | Y                                    | N                        | N                       | N                                                  | N                                                  | 4               |
| Homeida et al (1978)    | Y                                      | Y                                                                    | CT                                                       | N                                                | N                                               | CT                                                                                                       | Y                                    | N                        | N                       | CT                                                 | N                                                  | 3               |
| Wood et al (1982)       | Y                                      | Y                                                                    | Y                                                        | N                                                | N                                               | CT                                                                                                       | Y                                    | Y                        | N                       | CT                                                 | N                                                  | 5               |
| Daneshmend et al (1984) | Y                                      | Y                                                                    | Y                                                        | Y                                                | N                                               | CT                                                                                                       | N                                    | Y                        | Y                       | Y                                                  | Y                                                  | 8               |
| Chung et al (1986)      | Y                                      | N                                                                    | N                                                        | N                                                | N                                               | CT                                                                                                       | Y                                    | N                        | CT                      | N                                                  | N                                                  | 2               |

Y=Yes, N=No, CT=Can't tell

**Supplementary Table S4. Characteristics of the included studies**

| Sr. No. | Author                                      | Population | N <sup>a</sup> | Age (years) | Weight (kg) | Dosage form      |                  | Dose      |                         | Frequency       |
|---------|---------------------------------------------|------------|----------------|-------------|-------------|------------------|------------------|-----------|-------------------------|-----------------|
|         |                                             |            |                |             |             | Tab <sup>b</sup> | Inj <sup>c</sup> | Oral (mg) | IV <sup>d</sup> (mg/kg) |                 |
| 1-      | Gunnar nyberg et.al [23]                    | Healthy    | 5              | 28–46       | 73–96       | Tab              | Inj              | 200       | 200*                    | OD <sup>e</sup> |
|         |                                             |            |                |             |             |                  |                  | 400       |                         |                 |
| 2-      | Akio fujimura et.al [24]                    | Healthy    | 6              | 22–38       | 56–74       | Tab              |                  | 100       |                         | OD              |
| 3-      | H. L. Ellioyt et.al [25]                    | Healthy    | 9              | 21–38       |             | Tab              | Inj              | 400       | 1                       | OD              |
| 4-      | Richard l et.al [26]                        | Healthy    | 9              | 22–32       | 57–100      | Tab              | Inj              | 200       | 1.2                     | BD <sup>f</sup> |
| 5-      | Birgitte buur rasmussen, et.al [27]         | Healthy    | 14             | 18–45       | 51–75       | Tab              |                  | 100       |                         | BD              |
| 6-      | T.k. daneshmend & c.j.c. Roberts et.al [28] | Healthy    | 6              | 20–24       |             | Tab              | Inj              | 200       | 0.5                     | OD              |
| 7-      | M homeida et.al [29]                        | Healthy    | 7              | 22–42       | 71.4 ± 3.3  | Tab              | Inj              | 100       | 0.5                     | OD              |
| 8-      | A.j. wood* et.al [30]                       | Healthy    | 3              | 25–37       |             |                  | Inj              |           | 1                       | OD              |
| 9-      | T. K. Daneshmend et.al [31]                 | Healthy    | 5              | 21–26       |             | Tab              | Inj              | 200       | 0.5                     | OD              |
|         |                                             |            | 6              |             |             | Tab              |                  | 400       |                         | QD <sup>g</sup> |
| 10-     | M homeida et.al [29]                        | Diseased   | 10             |             | 74.6 ± 4.8  | Tab              | Inj              | 100       | 0.5                     | OD              |
| 11-     | A.j. wood* et.al [30]                       | Diseased   | 4              | 37–70       |             |                  | Inj              |           | 1                       | OD              |
| 12-     | Menger chung et.al [32]                     | Diseased   | 12             | 27–65       |             | Tab              |                  | 100       |                         | BD              |
|         |                                             |            |                |             |             |                  |                  | 200       |                         |                 |
|         |                                             |            |                |             |             |                  |                  | 300       |                         |                 |
|         |                                             |            |                |             |             |                  |                  | 400       |                         |                 |
|         |                                             |            |                |             |             |                  |                  | 600       |                         |                 |

Tab<sup>b</sup>: Tablet, IV<sup>d</sup>: Intravenous, Inj<sup>c</sup>: Injection, OD<sup>e</sup>: Once daily, BD<sup>f</sup>: Twice daily,

QD<sup>g</sup> : Four times daily N<sup>a</sup>: number of population. \* Dose is in mg.



**Supplementary Table S5: Pharmacokinetic parameters of the intravenous studies**

| <b>Sr. No.</b> | <b>Author</b>                 | <b>Dose (mg/kg)</b> | <b>Vd<sup>a</sup> (L)</b> | <b>C<sub>max</sub><sup>b</sup> (ng/ml)</b> | <b>T<sub>max</sub><sup>c</sup> (min)</b> | <b>AUC<sup>d</sup> (ng. min/ml)</b> | <b>t<sub>1/2</sub><sup>e</sup> (hr)</b> | <b>F<sup>f</sup> %</b> | <b>CL<sup>g</sup> (L/hr)</b> |
|----------------|-------------------------------|---------------------|---------------------------|--------------------------------------------|------------------------------------------|-------------------------------------|-----------------------------------------|------------------------|------------------------------|
| 1-             | T.k. daneshmend et.al [28]    | 0.5                 | 567 ± 63                  | 182 ± 57                                   | 85 ± 17                                  | 23986 ± 4307                        | 3.5 ± 0.4                               | 0.26 ± 0.03            | 115.3                        |
| 2-             | M homeida et.al [29]          | 0.5                 | 805 ± 91                  |                                            |                                          | 14986 ± 3258                        | 3.1 ± 0.4                               | 33 ± 3                 |                              |
| 3-             | T. K. Daneshmend et.al [31]   | 0.5                 | 542 ± 72                  |                                            |                                          | 24438 ± 5237                        | 3.4 ± 0.5                               | 30 ± 3                 | 116.4 ± 30.5                 |
|                |                               | 0.5                 | 520 ± 51                  | 338 ± 30                                   |                                          | 34924 ± 2288                        | 5.7 ± 0.75                              | 25 ± 2                 | 63.72 ± 6.9                  |
| 4-             | H. L. Ellioyt et.al [25]      | 1                   |                           | 327 ± 150                                  | 66 ± 18                                  | 52560 ± 26820                       | 5.2 ± 1.3                               | 20 ± 5                 | 93.6 ± 38.8                  |
| 5-             | Richard l. Lalonde et.al[ 26] | 1.2                 |                           | 274 ± 99                                   |                                          | 50100 ± 29760                       | 8.23 ± 1.38                             | 44 ± 14                | 109.11 ± 24.3                |
| 6-             | A.j. wood et.al [30]          | 1                   | 167.48–237                |                                            |                                          |                                     | 3.1–6.9                                 |                        | 16.43–49.6                   |

Vd<sup>a</sup>: Volume of distribution, C<sub>max</sub><sup>b</sup>: Maximum plasma concentration, T<sub>max</sub><sup>c</sup>: Time to reach maximum plasma concentration, AUC<sup>d</sup>: Area under the plasma concentration-time curve, t<sub>1/2</sub><sup>e</sup>: Half-life, F<sup>f</sup>: bioavailability, CL<sup>g</sup>: Clearance

**Supplementary Table S6: Pharmacokinetic parameters of oral studies**

| Sr. No. | Author                             | Dose (mg) | Vd <sup>a</sup> (L) | C <sub>max</sub> <sup>b</sup> (ng/ml) | T <sub>max</sub> <sup>c</sup> (min) | AUC <sup>d</sup> (ng min /ml) | t <sub>1/2</sub> <sup>e</sup> (hr) | F <sup>f</sup> % | CL <sup>g</sup> (L/hr) |
|---------|------------------------------------|-----------|---------------------|---------------------------------------|-------------------------------------|-------------------------------|------------------------------------|------------------|------------------------|
| 1-      | Gunnar nyberg et.al [23]           | 200       | 823                 |                                       | 30–120                              |                               | 1.6–8.5 hr                         |                  | 52.2 (mean)*           |
| 2-      | Akio fujimura et.al [24]           | 100       |                     | 40.5 ± 4.7                            | 48 ± 6                              | 9408 ± 1398                   | 0.74 ± 0.23                        |                  |                        |
| 3-      | H. L. Ellioyt et.al [25]           | 400       |                     | 327 ± 150                             | 66 ± 18                             | 52560 ± 26820                 | 5.5 ± 5.0                          | 20 ± 5           | 93.6 ± 38.88           |
| 4-      | Richard l. Lalonde et.al [26]      | 200       |                     | 274 ± 99                              |                                     | 50100 ± 29760                 | 8.27±1.38                          | 44 ± 14          | 276.47 ±109.7          |
| 5-      | Birgitte buur rasmussen et.al [27] | 100       |                     |                                       |                                     | 34260                         |                                    |                  |                        |
| 6-      | T.k. daneshmend et.al [28]         | 200       | 567 ± 63            | 182 ± 57                              | 85 ± 17                             | 36032 ± 10480                 | 3.06 ± 0.4                         | 26 ± 3           | 115.38 ± 25.02         |
| 7-      | M homeida et.al [29]               | 200       | 805 ± 91            |                                       |                                     | 16002 ± 2665                  | 2.56 ± 0.55                        | 33 ± 3           |                        |
| 8-      | T. K. Daneshmend et.al [31]        | 200       | 542 ± 72            |                                       |                                     | 40596 ± 11534                 | 3.21 ± 0.31                        | 30±3             | 116.4 ± 30.54          |
|         |                                    | 400       | 520 ± 59            |                                       |                                     | 51029 ± 7950                  | 4.3 ± 0.3                          | 25 ± 2           | 63.72 ± 6.96           |

Vd<sup>a</sup>: Volume of distribution, C<sub>max</sub><sup>b</sup>: Maximum plasma concentration, T<sub>max</sub><sup>c</sup> : Time to reach maximum plasma concentration,

AUC<sup>d</sup>: Area under the plasma concentration-time curve,

t<sub>1/2</sub><sup>e</sup>: Half-life, F<sup>f</sup>: bioavailability, CL<sup>g</sup>: Clearance, \* value of clearance is in mean.

**Supplementary Table S7: Pharmacokinetic parameters of diseased studies**

| Sr. No.     | Author                  | Dose      | Vd <sup>a</sup> (L) | C <sub>max</sub> <sup>b</sup> (ng/ml) | T <sub>max</sub> <sup>c</sup> (min) | AUC <sup>d</sup> (ng.min/ml) | t <sub>1/2</sub> <sup>e</sup> (hr) | F <sup>f</sup> % | CL <sup>g</sup> (L/hr) |
|-------------|-------------------------|-----------|---------------------|---------------------------------------|-------------------------------------|------------------------------|------------------------------------|------------------|------------------------|
| Oral        |                         |           |                     |                                       |                                     |                              |                                    |                  |                        |
| 1-          | M homeida et.al [29]    | 200 mg    | 526 ± 31            |                                       |                                     | 47640 ± 9040                 | 2.6 ± 0.3                          | 63 ± 7           |                        |
| 2-          | Menger chung et.al [32] | 100 mg    |                     | 81 ± 47                               | 78 ± 30                             | 27060 ± 16740                | 8                                  |                  |                        |
|             |                         | 200 mg    |                     | 218 ± 96                              | 72 ± 24                             | 66120 ± 33720                |                                    |                  |                        |
|             |                         | 300 mg    |                     | 214 ± 97                              | 90 ± 54                             | 81900 ± 42600                |                                    |                  |                        |
|             |                         | 400 mg    |                     | 466 ± 214                             | 66 ± 18                             | 130140 ± 66360               |                                    |                  |                        |
|             |                         | 600 mg    |                     | 642 ± 379                             | 90 ± 30                             | 226260 ± 133500              |                                    |                  |                        |
| Intravenous |                         |           |                     |                                       |                                     |                              |                                    |                  |                        |
| 3-          | A.j. wood et.al [30]    | 1 mg/kg   | 175–421             |                                       |                                     |                              | 4.1–7.4                            |                  | 15.9–63.96             |
| 4-          | M homeida et.al [29]    | 0.5 mg/kg | 526 ± 31            |                                       |                                     | 18646 ± 2788                 | 2.8 ± 0.4                          |                  |                        |

Vd<sup>a</sup>: Volume of distribution, C<sub>max</sub><sup>b</sup>: Maximum plasma concentration, T<sub>max</sub><sup>c</sup>: Time to reach maximum plasma concentration,

AUC<sup>d</sup>: Area under the plasma concentration-time curve, t<sub>1/2</sub><sup>e</sup>: Half-life, F<sup>f</sup>: bioavailability, CL<sup>g</sup>: Clearance

**Supplementary Table S8: Influence of food of the pharmacokinetics of Labetalol**

|                | Vd <sup>a</sup><br>(L) | C <sub>max</sub> <sup>b</sup><br>(ng/ml) | T <sub>max</sub> <sup>c</sup> (min) | AUC <sup>d</sup> (ng.min/ml) |                 | t <sub>1/2</sub> <sup>e</sup> (hr) |           | F <sup>f</sup> % | CL <sup>g</sup> (L/hr) |
|----------------|------------------------|------------------------------------------|-------------------------------------|------------------------------|-----------------|------------------------------------|-----------|------------------|------------------------|
|                |                        |                                          |                                     | Oral                         | IV <sup>h</sup> | Oral                               | IV        |                  |                        |
| Fasting State: | 567 ± 63               | 182 ± 57                                 | 85 ± 17                             | 36032 ± 10480                | 23986 ± 4307    | 3.0 ± 0.4                          | 3.5 ± 0.4 | 0.26 ± 0.03      | 115.38 ± 25.02         |
| Fed State:     | 685 ± 76               | 180 ± 33                                 | 125 ± 9                             | 40085 ± 11448                | 19887 ± 1412    | 3.0 ± 0.5                          | 3.6 ± 0.4 | 0.36 ± 0.05      | 140.64 ± 33.96         |

Vd<sup>a</sup>: Volume of distribution, C<sub>max</sub><sup>b</sup>: Maximum plasma concentration, T<sub>max</sub><sup>c</sup>: Time to reach maximum plasma concentration,

AUC<sup>d</sup>: Area under the plasma concentration-time curve, t<sub>1/2</sub><sup>e</sup>: Half-life, F<sup>f</sup>: bioavailability, CL<sup>g</sup>: Clearance, IV<sup>h</sup>: Intravenous

**Supplementary Table S9: Effect of enzyme induction and inhibition on labetalol pharmacokinetics**

|                     | Vd <sup>a</sup><br>(L) | C <sub>max</sub> <sup>b</sup> (ng/ml) | AUC <sup>c</sup> (ng.min/ml) |                 | t <sub>1/2</sub> <sup>d</sup> (hr) |            | F <sup>e</sup><br>% | CL <sup>f</sup> (L/hr) |
|---------------------|------------------------|---------------------------------------|------------------------------|-----------------|------------------------------------|------------|---------------------|------------------------|
|                     |                        |                                       | Oral                         | IV <sup>g</sup> | Oral                               | IV         |                     |                        |
| Before Glutethimide | 542 ± 72               |                                       | 40596 ± 11534                | 24438 ± 5237    | 3.2 ± 0.3                          | 3.4 ± 0.5  | 30 ± 3              | 116.4 ± 30.5           |
| After Glutethimide  | 509 ± 59               | 117 ± 46                              | 22057 ± 6276                 | 22447 ± 2398    | 2.93 ± 0.28                        | 3.7 ± 0.23 | 17 ± 3              | 104.04 ± 13.68         |
| Before Cimetidine:  | 520 ± 51               | 338 ± 30                              | 51029 ± 7950                 | 34924 ± 2288    | 4.3 ± 0.3                          | 5.7 ± 0.75 | 25 ± 2              | 63.72 ± 6.96           |
| After Cimetidine:   | 445 ± 24               |                                       | 84772 ± 19444                | 37943 ± 2521    | 4.36 ± 0.38                        | 5.3 ± 0.5  | 39 ± 8              | 57.84 ± 6.42           |

Vd<sup>a</sup>: Volume of distribution, C<sub>max</sub><sup>b</sup>: Maximum plasma concentration, AUC<sup>c</sup>: Area under the plasma concentration-time curve,

t<sub>1/2</sub><sup>d</sup>: Half-life, F<sup>e</sup>: bioavailability, CL<sup>f</sup>: Clearance, IV<sup>g</sup>: Intravenous

**Supplementary Table S10:** Average fold error (AFE) in a healthy population

| <b>R<sub>obs/pre</sub> of all studies</b> | <b><math>\sum R \text{ ratio}</math></b> | <b><math>\sum R \text{ ratio}/N</math></b> | <b><math>\text{Log } \sum R \text{ ratio}/N</math></b> | <b><math>10^{\text{Log } \sum R \text{ ratio}/N}</math></b> |
|-------------------------------------------|------------------------------------------|--------------------------------------------|--------------------------------------------------------|-------------------------------------------------------------|
| <b>HEALTHY</b>                            |                                          |                                            |                                                        |                                                             |
| <b>IV</b>                                 |                                          |                                            |                                                        |                                                             |
| <b>C<sub>max</sub><sup>c</sup></b>        |                                          |                                            |                                                        |                                                             |
| 1.56                                      | 4.35                                     | 1.45                                       | 0.161                                                  | 1.44                                                        |
| 1.19                                      |                                          |                                            |                                                        |                                                             |
| 1.60                                      |                                          |                                            |                                                        |                                                             |
| <b>AUC<sub>0-t</sub><sup>d</sup></b>      |                                          |                                            |                                                        |                                                             |
| 1.09                                      | 3.627                                    | 1.209                                      | 0.082                                                  | 1.207                                                       |
| 1.039                                     |                                          |                                            |                                                        |                                                             |
| 1.498                                     |                                          |                                            |                                                        |                                                             |
| <b>CL<sup>e</sup></b>                     |                                          |                                            |                                                        |                                                             |
| 1.2                                       | 2.73                                     | 0.91                                       | -0.040                                                 | 0.912                                                       |
| 0.9                                       |                                          |                                            |                                                        |                                                             |
| 0.63                                      |                                          |                                            |                                                        |                                                             |
| <b>Oral</b>                               |                                          |                                            |                                                        |                                                             |
| <b>C<sub>max</sub></b>                    |                                          |                                            |                                                        |                                                             |
| 1.13                                      | 2.39                                     | 1.195                                      | 0.077                                                  | 1.193                                                       |
| 1.26                                      |                                          |                                            |                                                        |                                                             |
| <b>AUC<sub>0-t</sub></b>                  |                                          |                                            |                                                        |                                                             |
| 0.80                                      | 1.69                                     | 0.845                                      | -0.073                                                 | 0.84                                                        |
| 0.89                                      |                                          |                                            |                                                        |                                                             |
| <b>CL</b>                                 |                                          |                                            |                                                        |                                                             |
| 1.18                                      | 2.11                                     | 1.055                                      | 0.023                                                  | 1.054                                                       |
| 0.93                                      |                                          |                                            |                                                        |                                                             |

R<sup>a</sup> ratio: R<sub>obs</sub>/R<sub>pre</sub>, N<sup>b</sup>: total number of studies, C<sub>max</sub><sup>c</sup>: Maximum plasma concentration, AUC<sub>0-t</sub><sup>d</sup>: Area under the plasma concentration versus time curve, CL<sup>e</sup>: Clearance

**Supplementary Table S11:** Average fold error (AFE) in a diseased population.

| $R_{\text{obs/pre of all studies}}$  | $\sum R \text{ ratio}$ | $\frac{\sum R \text{ ratio}}{N}$ | $\text{Log } \frac{\sum R \text{ ratio}}{N}$ | $10^{\text{Log } \frac{\sum R \text{ ratio}}{N}}$ |
|--------------------------------------|------------------------|----------------------------------|----------------------------------------------|---------------------------------------------------|
| <b>HEPATIC DISEASE</b>               |                        |                                  |                                              |                                                   |
| <b>IV</b>                            |                        |                                  |                                              |                                                   |
| <b>C<sub>max</sub><sup>c</sup></b>   |                        |                                  |                                              |                                                   |
| 0.99                                 | 0.99                   | 0.99                             | 0.0043                                       | 1.009                                             |
| <b>AUC<sub>0-t</sub><sup>d</sup></b> |                        |                                  |                                              |                                                   |
| 0.93                                 | 0.93                   | 0.93                             | -0.03                                        | 0.933                                             |
| <b>CL<sup>e</sup></b>                |                        |                                  |                                              |                                                   |
| 1.16                                 | 1.16                   | 1.16                             | 0.06                                         | 1.148                                             |
| <b>Oral</b>                          |                        |                                  |                                              |                                                   |
| <b>C<sub>max</sub></b>               |                        |                                  |                                              |                                                   |
| 2.635                                | 2.635                  | 2.635                            | 0.420                                        | 2.63                                              |
| <b>AUC<sub>0-t</sub></b>             |                        |                                  |                                              |                                                   |
| 1.5                                  | 1.5                    | 1.5                              | 0.176                                        | 1.499                                             |
| <b>CL</b>                            |                        |                                  |                                              |                                                   |
| 0.6                                  | 0.6                    | 0.6                              | -0.22                                        | 0.60                                              |
| <b>RENAL FAILURE</b>                 |                        |                                  |                                              |                                                   |
| <b>C<sub>max</sub></b>               |                        |                                  |                                              |                                                   |
| 0.9109                               | 0.9109                 | 0.9109                           | -0.040                                       | 0.9120                                            |
| <b>AUC<sub>0-t</sub></b>             |                        |                                  |                                              |                                                   |
| 0.77                                 | 0.77                   | 0.77                             | -0.11                                        | 0.77                                              |
| <b>CL</b>                            |                        |                                  |                                              |                                                   |
| 1.5                                  | 1.5                    | 1.5                              | 0.17                                         | 1.479                                             |

R<sup>a</sup> ratio:  $R_{\text{Obs}}/R_{\text{Pre}}$ , N<sup>b</sup>: total number of studies, C<sub>max</sub><sup>c</sup>: Maximum plasma concentration, AUC<sub>0-t</sub><sup>d</sup>: Area under the plasma concentration versus time curve, CL<sup>e</sup>: Clearance

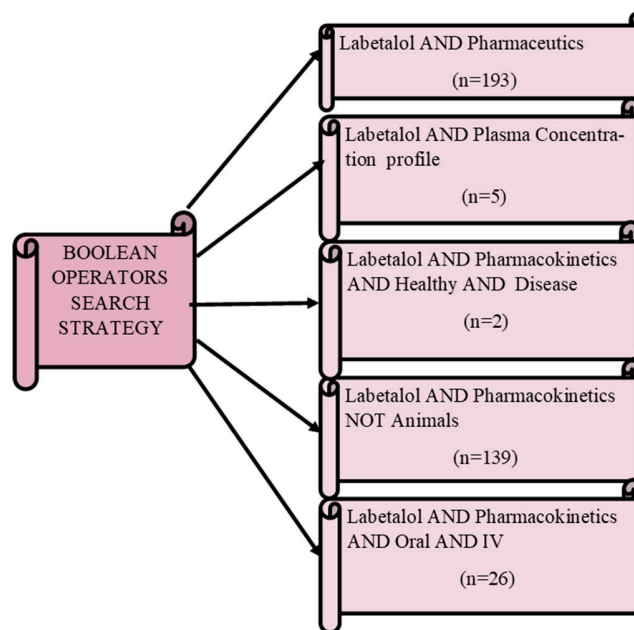

**Supplementary Figure S1. Boolean Operators search strategy**

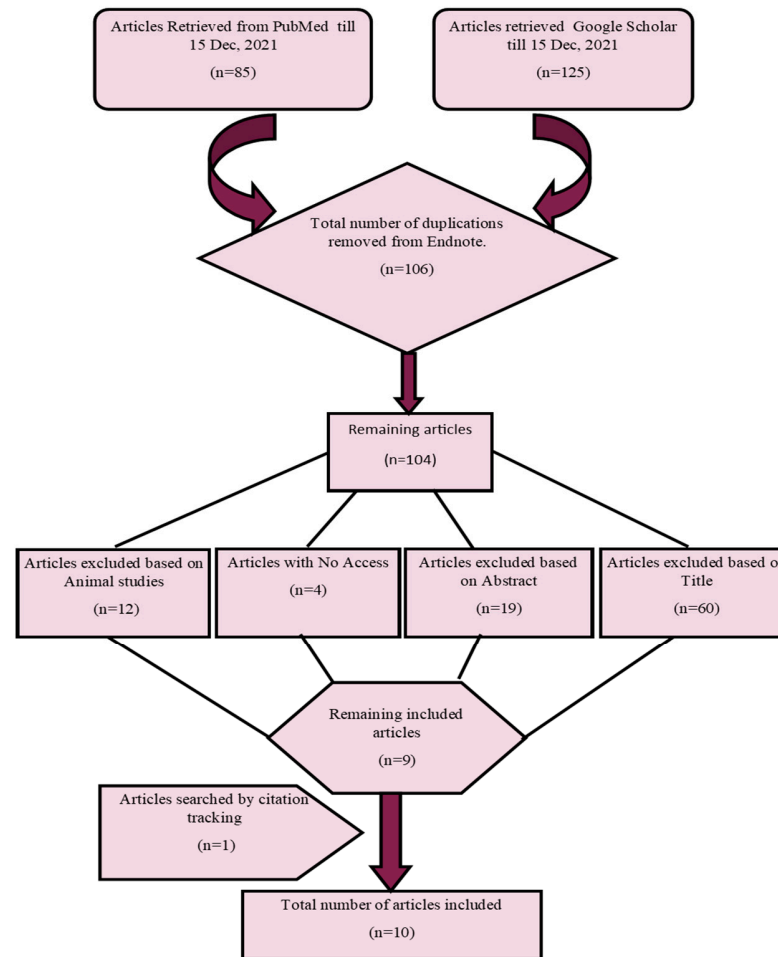

**Supplementary Figure S2. PRISMA flow chat diagram**
